# Supplementary material for: Functional Metagenomics of Escherichia coli O157:H7 Interactions with Spinach Indigenous Microorganisms during Biofilm Formation
Source: PLOS journal article supplement (doi:10.1371/journal.pone.0044186), 2012-09-05
Supplement: S7 (10.1371/journal.pone.0044186.s007) [file journal.pone.0044186.s007]

Table S4. All genes with significant difference in signal intensity between the control- and the EcO157-inoculated biofilm community

| Gene name or protein   | Gene category         | Sub-category              | Biofilms <sup>a</sup>        |
|------------------------|-----------------------|---------------------------|------------------------------|
| B_lactamase_A          | Antibiotic resistance | Beta-lactamases           | 24-C and 24-S                |
| Tet                    | Antibiotic resistance | other                     | 48-C and 48-S                |
| lysin                  | Bacteria phage        | LYSIS                     | 24-C and 24-S                |
| <i>uvsW</i>            | Bacteria phage        | REPLICATION               | 24-C and 24-S                |
| DNA_polymerase_type_I  | Bacteria phage        | REPLICATION               | 48-C and 48-S                |
| primase                | Bacteria phage        | REPLICATION               | 48-C and 48-S                |
| T4_type_portal_protein | Bacteria phage        | REPLICATION               | 48-C and 48-S                |
| scaffold               | Bacteria phage        | STRUCTURAL                | 24-C and 24-S                |
| FTHFS                  | Carbon cycling        | Acetogenesis              | 48-C and 48-S                |
| cellobiase             | Carbon cycling        | Carbon degradataion       | 24-C and 24-S; 48-C and 48-S |
| exoglucanase           | Carbon cycling        | Carbon degradataion       | 24-C and 24-S                |
| endochitinase          | Carbon cycling        | Carbon degradataion       | 24-C and 24-S                |
| phenol_oxidase         | Carbon cycling        | Carbon degradataion       | 24-C and 24-S                |
| glucoamylase           | Carbon cycling        | Carbon degradataion       | 24-C and 24-S                |
| <i>vanA</i>            | Carbon cycling        | Carbon degradataion       | 48-C and 48-S                |
| <i>amyA</i>            | Carbon cycling        | Carbon degradataion       | 48-C and 48-S                |
| <i>pulA</i>            | Carbon cycling        | Carbon degradataion       | 48-C and 48-S                |
| rubisco                | Carbon cycling        | Carbon fixation           | 24-C and 24-S                |
| <i>pcc</i>             | Carbon cycling        | Carbon fixation           | 24-C and 24-S                |
| <i>aclB</i>            | Carbon cycling        | Carbon fixation           | 24-C and 24-S                |
| CODH                   | Carbon cycling        | Carbon fixation           | 48-C and 48-S                |
| <i>mmoX</i>            | Carbon cycling        | Methane                   | 24-C and 24-S                |
| <i>mcrA</i>            | Carbon cycling        | Methane                   | 24-C and 24-S                |
| P450                   | Energy process        | NA                        | 24-C and 24-S                |
| Ni_Fe_hydrogenase      | Energy process        | NA                        | 24-C and 24-S                |
| cytochrome             | Energy process        | Energy process            | 24-C and 24-S                |
| Al                     | Metal Resistance      | Aluminum                  | 48-C and 48-S                |
| ArsA                   | Metal Resistance      | Arsenic                   | 24-C and 24-S; 48-C and 48-S |
| ArsC                   | Metal Resistance      | Arsenic                   | 24-C and 24-S                |
| CadA                   | Metal Resistance      | Cadmium                   | 24-C and 24-S                |
| <i>czcA</i>            | Metal Resistance      | Cadmium,Cobalt,Zinc       | 24-C and 24-S                |
| <i>czcC</i>            | Metal Resistance      | Cadmium,Cobalt,Zinc       | 48-C and 48-S                |
| ChrA                   | Metal Resistance      | Chromium                  | 24-C and 24-S                |
| CopA                   | Metal Resistance      | Copper                    | 24-C and 24-S                |
| CusF                   | Metal Resistance      | Copper                    | 24-C and 24-S                |
| <i>pbrD</i>            | Metal Resistance      | Lead                      | 24-C and 24-S                |
| <i>pbrT</i>            | Metal Resistance      | Lead                      | 24-C and 24-S                |
| <i>mer</i>             | Metal Resistance      | Mercury                   | 24-C and 24-S                |
| <i>silC</i>            | Metal Resistance      | Silver                    | 24-C and 24-S                |
| <i>silA</i>            | Metal Resistance      | Silver                    | 48-C and 48-S                |
| <i>terC</i>            | Metal Resistance      | Tellurium                 | 24-C and 24-S; 48-C and 48-S |
| <i>tehB</i>            | Metal Resistance      | Tellurium                 | 24-C and 24-S                |
| <i>zntA</i>            | Metal Resistance      | Zinc                      | 24-C and 24-S                |
| <i>nasA</i>            | Nitrogen              | Assimilatory N reduction  | 48-C and 48-S                |
| <i>narG</i>            | Nitrogen              | Denitrification           | 24-C and 24-S                |
| <i>nirS</i>            | Nitrogen              | Denitrification           | 24-C and 24-S                |
| <i>napA</i>            | Nitrogen              | Dissimilatory N reduction | 24-C and 24-S                |
| <i>nifH</i>            | Nitrogen              | Nitrogen fixation         | 24-C and 24-S; 48-C and 48-S |
| <i>todF</i>            | Organic Remediation   | NA                        | 24-C and 24-S; 48-C and 48-S |

|                |                     |                                |                              |
|----------------|---------------------|--------------------------------|------------------------------|
| <i>catB</i>    | Organic Remediation | Aromatics                      | 24-C and 24-S; 48-C and 48-S |
| <i>tftH</i>    | Organic Remediation | Aromatics                      | 24-C and 24-S; 48-C and 48-S |
| <i>pobA</i>    | Organic Remediation | Aromatics                      | 24-C and 24-S; 48-C and 48-S |
| <i>phtA</i>    | Organic Remediation | Aromatics                      | 24-C and 24-S; 48-C and 48-S |
| <i>pimF</i>    | Organic Remediation | Aromatics                      | 24-C and 24-S                |
| <i>nmoA</i>    | Organic Remediation | Aromatics                      | 24-C and 24-S                |
| <i>bclA</i>    | Organic Remediation | Aromatics                      | 24-C and 24-S                |
| <i>mdlC</i>    | Organic Remediation | Aromatics                      | 24-C and 24-S                |
| <i>phaB</i>    | Organic Remediation | Aromatics                      | 24-C and 24-S                |
| <i>oxdB</i>    | Organic Remediation | Aromatics                      | 24-C and 24-S                |
| catechol_B     | Organic Remediation | Aromatics                      | 24-C and 24-S                |
| <i>flnB</i>    | Organic Remediation | Aromatics                      | 24-C and 24-S                |
| <i>nagG</i>    | Organic Remediation | Aromatics                      | 24-C and 24-S                |
| <i>benAB</i>   | Organic Remediation | Aromatics                      | 24-C and 24-S                |
| <i>hmgC</i>    | Organic Remediation | Aromatics                      | 24-C and 24-S                |
| <i>apc</i>     | Organic Remediation | Aromatics                      | 24-C and 24-S                |
| <i>bbs</i>     | Organic Remediation | Aromatics                      | 24-C and 24-S                |
| <i>pchCF</i>   | Organic Remediation | Aromatics                      | 24-C and 24-S                |
| Arylest        | Organic Remediation | Aromatics                      | 24-C and 24-S                |
| BADH           | Organic Remediation | Aromatics                      | 24-C and 24-S                |
| Catechol       | Organic Remediation | Aromatics                      | 24-C and 24-S                |
| <i>tdnB</i>    | Organic Remediation | Aromatics                      | 24-C and 24-S                |
| <i>nahA</i>    | Organic Remediation | Aromatics                      | 24-C and 24-S                |
| <i>mhpB</i>    | Organic Remediation | Aromatics                      | 48-C and 48-S                |
| <i>bbsG</i>    | Organic Remediation | Aromatics                      | 48-C and 48-S                |
| <i>cbdA</i>    | Organic Remediation | Aromatics                      | 48-C and 48-S                |
| <i>bphB</i>    | Organic Remediation | Aromatics                      | 48-C and 48-S                |
| <i>arhA</i>    | Organic Remediation | Aromatics                      | 48-C and 48-S                |
| <i>dxnA</i>    | Organic Remediation | Aromatics                      | 48-C and 48-S                |
| <i>phdCI</i>   | Organic Remediation | Aromatics                      | 48-C and 48-S                |
| <i>phdI</i>    | Organic Remediation | Aromatics                      | 48-C and 48-S                |
| <i>trzN</i>    | Organic Remediation | Herbicides related             | 24-C and 24-S                |
| <i>phn</i>     | Organic Remediation | Herbicides related             | 48-C and 48-S                |
| <i>atzB</i>    | Organic Remediation | Herbicides related             | 48-C and 48-S                |
| <i>atzC</i>    | Organic Remediation | Herbicides related             | 48-C and 48-S                |
| <i>atzD</i>    | Organic Remediation | Herbicides related             | 48-C and 48-S                |
| <i>chnE</i>    | Organic Remediation | Other Hydrocarbons             | 24-C and 24-S                |
| <i>Xamo</i>    | Organic Remediation | Other Hydrocarbons             | 48-C and 48-S                |
| <i>alkH</i>    | Organic Remediation | Other Hydrocarbons             | 48-C and 48-S                |
| <i>alkJ</i>    | Organic Remediation | Other Hydrocarbons             | 48-C and 48-S                |
| <i>msmABCD</i> | Organic Remediation | Others                         | 24-C and 24-S; 48-C and 48-S |
| <i>alkK</i>    | Organic Remediation | Others                         | 24-C and 24-S                |
| MSAD           | Organic Remediation | Others                         | 48-C and 48-S                |
| <i>linB</i>    | Organic Remediation | Pesticides related<br>compound | 24-C and 24-S; 48-C and 48-S |
| <i>linC</i>    | Organic Remediation | Pesticides related<br>compound | 48-C and 48-S                |
| <i>gyrB</i>    | other category      | Phylogenetic marker            | 24-C and 24-S                |
| phytase        | Phosphorus          | Phosphorus utilization         | 24-C and 24-S; 48-C and 48-S |
| <i>desR</i>    | Stress              | Cold shock                     | 24-C and 24-S                |
| <i>grpE</i>    | Stress              | Heat shock                     | 24-C and 24-S                |
| <i>glnA</i>    | Stress              | Nitrogen limitation            | 48-C and 48-S                |
| <i>proV</i>    | Stress              | Osmotic stress                 | 24-C and 24-S                |
| <i>cydA</i>    | Stress              | Oxygen limitation              | 48-C and 48-S                |

|                        |           |                      |                              |
|------------------------|-----------|----------------------|------------------------------|
| <i>arcA</i>            | Stress    | Oxygen limitation    | 48-C and 48-S                |
| <i>katE</i>            | Stress    | Oxygen stress        | 24-C and 24-S                |
| <i>ahpC</i>            | Stress    | Oxygen stress        | 24-C and 24-S                |
| <i>ahpF</i>            | Stress    | Oxygen stress        | 48-C and 48-S                |
| <i>pstA</i>            | Stress    | Phosphate limitation | 24-C and 24-S                |
| <i>pstB</i>            | Stress    | Phosphate limitation | 24-C and 24-S                |
| <i>phoB</i>            | Stress    | Phosphate limitation | 24-C and 24-S                |
| <i>phoA</i>            | Stress    | Phosphate limitation | 24-C and 24-S                |
| <i>pstC</i>            | Stress    | Phosphate limitation | 48-C and 48-S                |
| <i>clpC</i>            | Stress    | Protein stress       | 24-C and 24-S                |
| <i>sigma_24</i>        | Stress    | Sigma factors        | 24-C and 24-S; 48-C and 48-S |
| <i>sigma_70</i>        | Stress    | Sigma factors        | 24-C and 24-S                |
| <i>rpoS</i> (sigma 38) | Stress    | Sigma factors        | 48-C and 48-S                |
| APS_AprB               | Sulphur   | NA                   | 24-C and 24-S                |
| APS_AprA               | Sulphur   | NA                   | 24-C and 24-S                |
| <i>aprA</i>            | Sulphur   | Other                | 48-C and 48-S                |
| <i>dsrA</i>            | Sulphur   | sulfite reductase    | 24-C and 24-S                |
| <i>dsrB</i>            | Sulphur   | sulfite reductase    | 24-C and 24-S                |
| <i>iro</i>             | virulence | NA                   | 24-C and 24-S                |
| <i>vip</i>             | virulence | NA                   | 24-C and 24-S                |
| <i>cap</i>             | virulence | NA                   | 24-C and 24-S                |

---

<sup>a</sup>The t test was performed between the control- and the EcO157 inoculated biofilm (n=3) at each time point (24 h or 48 h) using all detected probes for each gene. Significance was measured by  $P < 0.05$ .
