# Supplementary material for: Functional Metagenomics of Escherichia coli O157:H7 Interactions with Spinach Indigenous Microorganisms during Biofilm Formation
Source: PLOS journal article supplement (doi:10.1371/journal.pone.0044186), 2012-09-05
Supplement: S9 (10.1371/journal.pone.0044186.s009) [file journal.pone.0044186.s009]

Table S6. Phylogeny origins of genes involved in nitrogen cycling in biofilm communities

| Nitrogen cycling process (gene)                                                    | Phylum <sup>a</sup>          | Normalized signal intensity <sup>b</sup> |               |              |               |
|------------------------------------------------------------------------------------|------------------------------|------------------------------------------|---------------|--------------|---------------|
|                                                                                    |                              | 24-C                                     | 24-S          | 48-C         | 48-S          |
| Ammonification ( <i>ureC</i> )                                                     | <i>Actinobacteria</i>        | 62.8 ± 6.9                               | 59.4 ± 17.0   | 45.1 ± 4.8   | 37.1 ± 5.4*   |
|                                                                                    | <i>Cyanobacteria</i>         | 12.9 ± 1.3                               | 13.3 ± 0.7    | 12.7 ± 2.1   | 14.0 ± 4.7    |
|                                                                                    | <i>Firmicutes</i>            | 6.3 ± 1.6                                | 7.9 ± 2.5     | 7.2 ± 1.1    | 10.3 ± 3.7    |
|                                                                                    | <i>Proteobacteria</i>        | 146.4 ± 3.9                              | 149.4 ± 8.0   | 138.2 ± 31.3 | 117.7 ± 5.2   |
|                                                                                    | <b>Uncultured bacterium</b>  | 4.2 ± 0.7                                | 3.0 ± 0.6*    | 3.4 ± 1.5    | 2.0 ± 1.0     |
|                                                                                    | <i>Ascomycota</i>            | 10.9 ± 1.0                               | 11.7 ± 2.5    | 9.5 ± 1.5    | 8.3 ± 1.4     |
| Dissimilatory nitrogen reduction ( <i>napA</i> and <i>nrfA</i> )                   | <i>Actinobacteria</i>        | 1.8 ± 0.6                                | 1.2 ± 0.5     | 1.2 ± 0.4    | 0.4 ± 0.3     |
|                                                                                    | <i>Bacteroidetes</i>         | 4.4 ± 0.5                                | 5.2 ± 0.7     | 4.1 ± 0.9    | 3.9 ± 0.4     |
|                                                                                    | <i>Firmicutes</i>            | 5.4 ± 1.4                                | 4.9 ± 0.4     | 4.1 ± 1.0    | 3.7 ± 1.0     |
|                                                                                    | <b><i>Proteobacteria</i></b> | 74.7 ± 6.7                               | 73.3 ± 6.1    | 67.1 ± 10.5  | 51.9 ± 9.5*   |
|                                                                                    | Uncultured bacteria          | 32.6 ± 2.2                               | 28.9 ± 3.5    | 32.4 ± 8.1   | 30.8 ± 2.1    |
|                                                                                    | <i>Verrucomicrobia</i>       | 1.4 ± 0.7                                | 1.5 ± 1.5     | 0.6 ± 0.1    | 0.8 ± 1.0     |
| Assimilatory nitrogen reduction ( <i>nasA</i> )                                    | <b><i>Cyanobacteria</i></b>  | 9.3 ± 1.5                                | 11.9 ± 1.7*   | 6.6 ± 0.8    | 7.2 ± 1.4     |
|                                                                                    | <i>Proteobacteria</i>        | 19.2 ± 3.0                               | 16.0 ± 2.6    | 11.1 ± 0.9   | 10.9 ± 0.6    |
|                                                                                    | <b>Uncultured bacterium</b>  | 22.1 ± 2.6                               | 15.5 ± 1.5**  | 14.7 ± 1.6   | 9.7 ± 1.6**   |
| Denitrification ( <i>narG</i> , <i>nirK/nirS</i> , <i>norB</i> , and <i>nosZ</i> ) | <i>Actinobacteria</i>        | 4.2 ± 0.8                                | 3.6 ± 0.6     | 2.3 ± 0.6    | 1.8 ± 0.2     |
|                                                                                    | <b><i>Proteobacteria</i></b> | 53.6 ± 10.7                              | 49.2 ± 6.3    | 37.8 ± 7.3   | 28.0 ± 2.7*   |
|                                                                                    | <b>Uncultured bacterium</b>  | 586.8 ± 53.5                             | 525.0 ± 20.1* | 451.1 ± 65.3 | 388.2 ± 16.0* |
| Nitrogen fixation ( <i>nifH</i> )                                                  | <i>Euryarchaeota</i> ;       | 9.4 ± 0.8                                | 9.4 ± 1.2     | 10.7 ± 1.9   | 10.0 ± 1.4    |
|                                                                                    | <i>Actinobacteria</i>        | 3.4 ± 0.8                                | 3.7 ± 0.8     | 3.9 ± 1.5    | 4.6 ± 0.1     |
|                                                                                    | <b><i>Chlorobi</i></b>       | 2.8 ± 1.2                                | 1.0 ± 0.5*    | 0.6 ± 0.2    | 0.6 ± 0.4     |
|                                                                                    | <i>Cyanobacteria</i>         | 4.8 ± 0.5                                | 4.7 ± 0.2     | 4.2 ± 1.6    | 3.8 ± 0.5     |
|                                                                                    | <b><i>Firmicutes</i></b>     | 4.5 ± 1.1                                | 4.9 ± 1.4     | 5.2 ± 1.1    | 6.7 ± 0.3*    |
|                                                                                    | <b><i>Proteobacteria</i></b> | 38.8 ± 2.8                               | 34.9 ± 6.5    | 26.2 ± 2.5   | 16.9 ± 1.2**  |
|                                                                                    | <b>Uncultured bacterium</b>  | 118.9 ± 5.5                              | 95.0 ± 1.7**  | 97.0 ± 7.2   | 85.3 ± 5.0*   |

<sup>a</sup>The phyla in bold were those with a significant change in their abundance between the control- and the EcO157-inoculated biofilm at either 24 h or 48 h; <sup>b</sup>The sum of normalized signal intensity for the all DNA probes detected within the same phylum. The t test was performed between the control- and pathogen inoculated biofilm (n=3) at each time point and the significance was labeled at 24-S or 48-S (\*  $P < 0.1$  and \*\*  $P < 0.05$ ).
